# Supplementary material for: Template-controlled topochemical photodimerization based on “organometallic macrocycles” through single-crystal to single-crystal transformation
Source: Royal Society of Chemistry journal article supplement (doi:10.1039/b717554j), 2008-01-01

## Supporting Information

### **Template-Controlled Topochemical Photodimerization Based on “Organometallic Macrocycles” through Single-Crystal-to-Single-crystal Transformation**

Ying-Feng Han, Yue-Jian Lin, Wei-Guo Jia, Guo-Liang Wang, and Guo-Xin Jin\*

*Shanghai Key Laboratory of Molecular Catalysis and Innovative Material, Department  
of Chemistry, Fudan University, Shanghai 200433 (P. R. China)*

E-mail: [gxjin@fudan.edu.cn](mailto:gxjin@fudan.edu.cn)

**Figure S1**  $^1\text{H}$  NMR spectrum for **2a**.

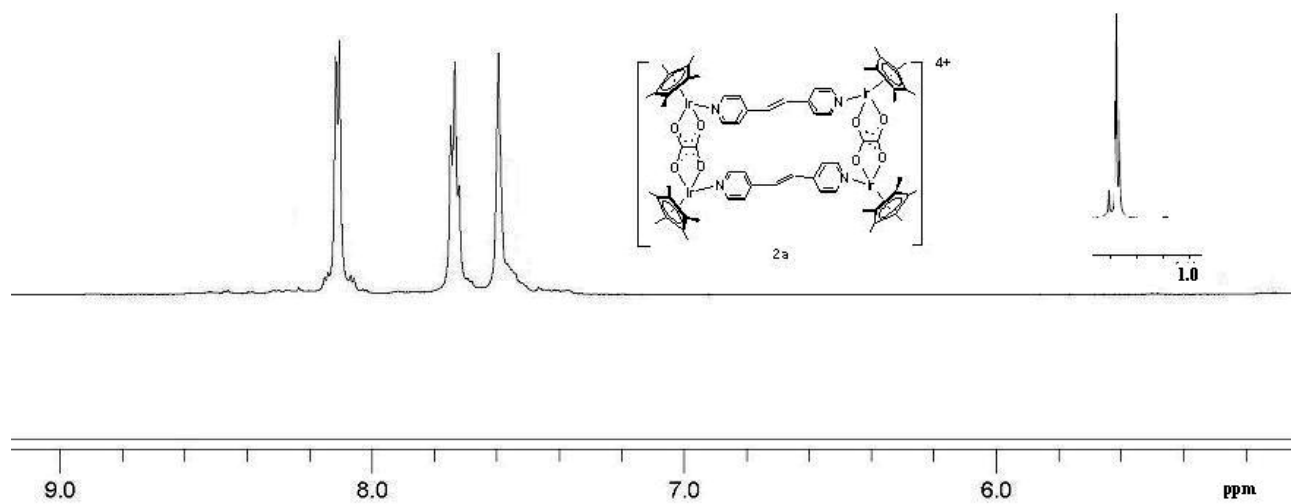

**Figure S2**  $^1\text{H}$  NMR spectrum for **2a** after irradiation 15 h (80% yield of **3a**).

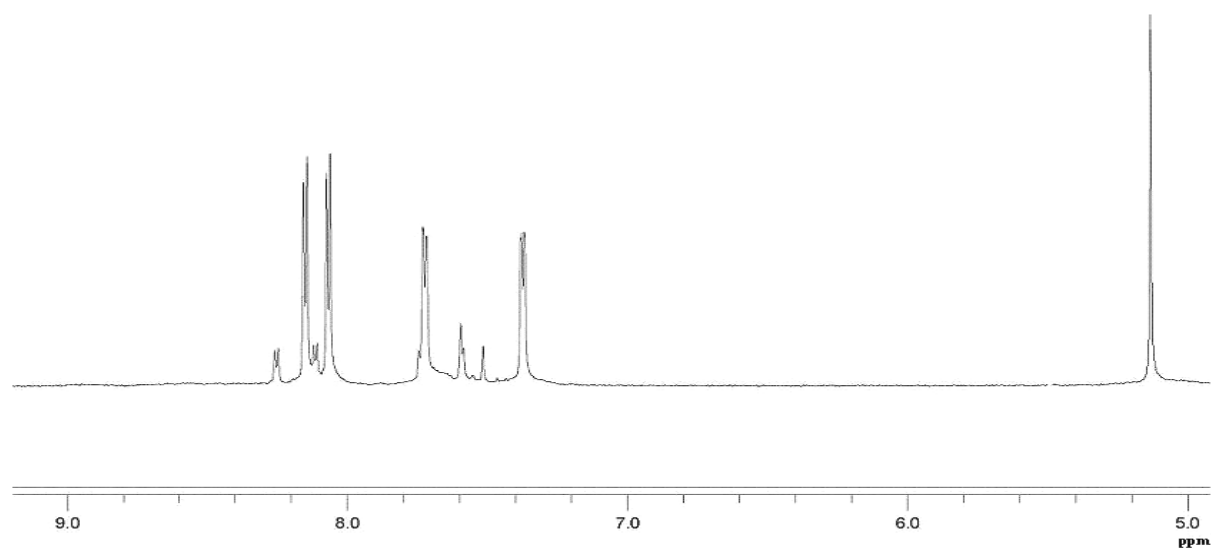

**Figure S3**  $^1\text{H}$  NMR spectrum for **3a** (**2a** after irradiation 25 h).

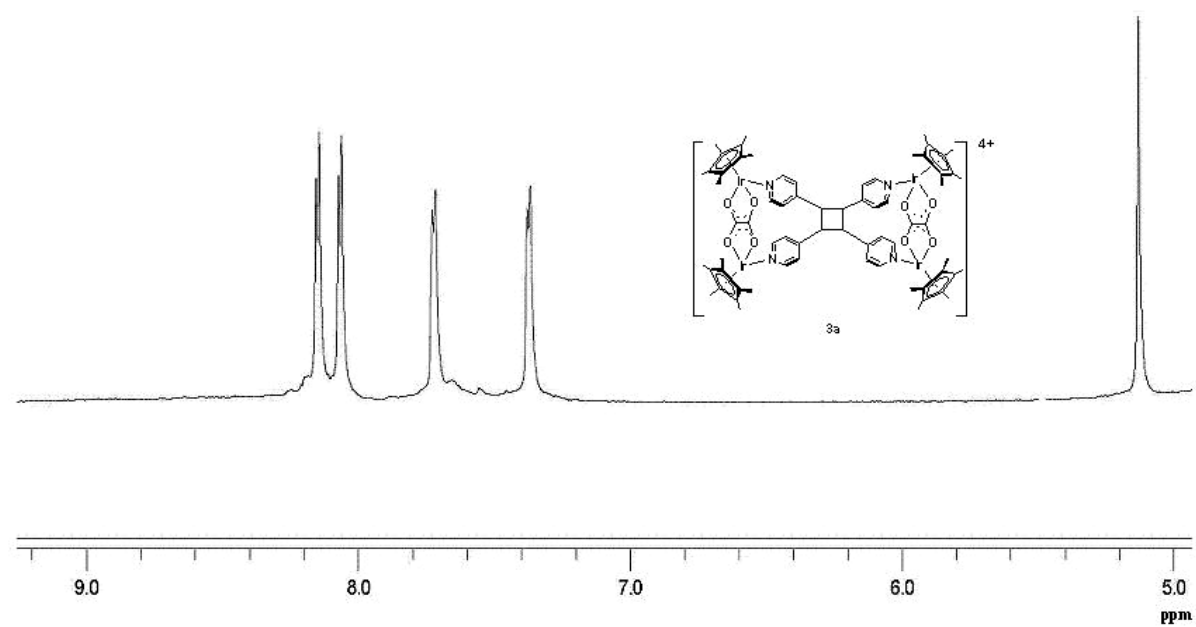

**Figure S4**  $^1\text{H}$  NMR spectrum for **2b**.

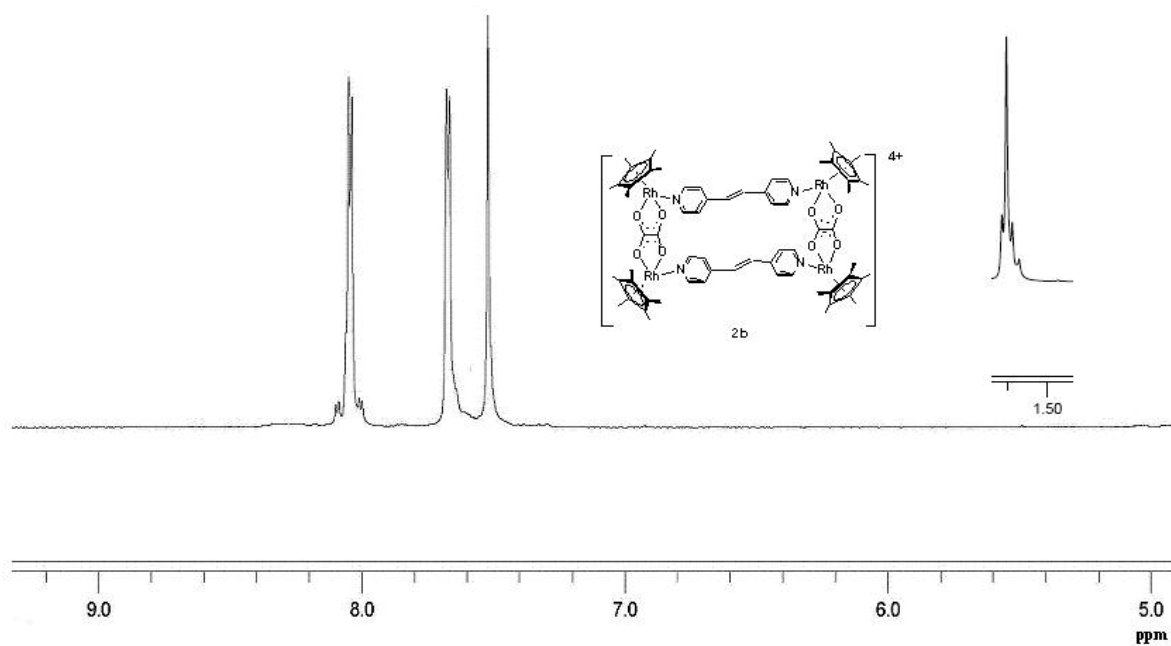

**Figure S3**  $^1\text{H}$  NMR spectrum for **2b** after irradiation 50 h.

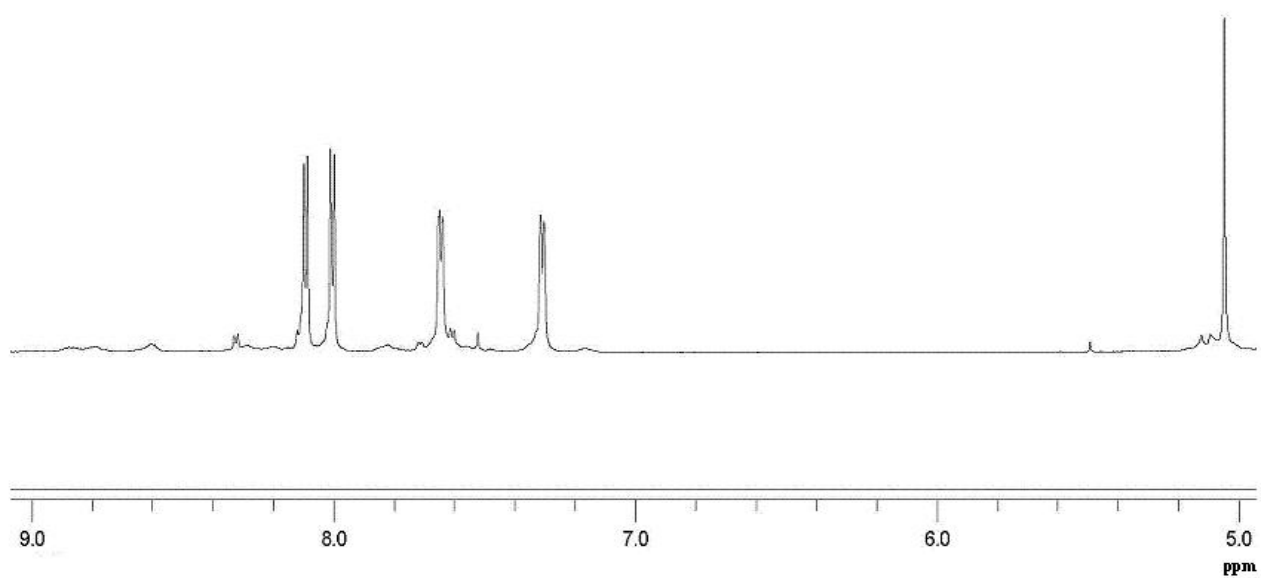

Supplement: b717554j.pdf [file b717554j.pdf]
